# Supplementary material
Source: publisher figshare collection journal article supplement (https://gsajournals.figshare.com/ndownloader/files/26770703)
Supplement: Supplementary file 1 [file 26770703]

## Sheet: Sheet1
Table S2: PCR Primers
Name	5'-3' Sequence	Notes
MRG119	TCTGGACGCGCCGCTCACCCGCACGGCAGAGACCAATCAGacatggaggcccagaataccc
MRG121	ATTATATATATAGTAATGTCGTTAACCGTTGATTTTTAcagtatagcgaccagcattcac
MRG137	AAATCAAGTGGTGGAACATC
MRG181	TGCCATGAAAACGTGAACAGAAACTTTTATTGAGGTCATGcggatccccgggttaattaa
MRG182	CACACGCACGTTTGGATTATTACCTTCAATGACATTGCTAgaattcgagctcgtttaaac
MRG316	GAACCGGACTAGCTGACTTTA
MRG326	GGTTTCTCCAACAATACCATAGACTTCGTCCATAGCTCTCAGCGTCCTCCcggatccccgggttaattaa
MRG327	CTGTTCTTTGAGCGATGAGGGACATCGACGTAGATTCTCCTCCGGGAATAgaattcgagctcgtttaaac
MRG328	GTCTTCTCCAGTCATCGTGA
MRG353	ATTTCGTTAAATAGAAAGAAAAACCATATCTTAAAGTATGcggatccccgggttaattaa
MRG354	TTTTGGTAATATAAAAATGTGGAAAACCGGCGGTATTTTAgaattcgagctcgtttaaac
MRG411	CAAAATTTGAACGATGGAAG
MRG412	AGTTCGTGACCAGTTATTGC
MRG415	TTTTGGTAATATAAAAATGTGGAAAACCGGCGGTATTTTACGGATCCCCGGGTTAATTAA
MRG416	ATTTCGTTAAATAGAAAGAAAAACCATATCTTAAAGTATGGAATTCGAGCTCGTTTAAAC
MRG420	ACG GGT GCG CGA ATA AA	Primer used for Sanger Sequencing in Figure S1B
MRG428	ATAATTAGATCATTTTACAATGTGTACCGAGTAATACAAACGGATCCCCGGGTTAATTAA
MRG429	AGGTATTTTGAGCATTATAACACTTTTTCCCCCCTCAACGAATTCGAGCTCGTTTAAACT
MRG431	TACCCTTGTCGGCTGAGTCATTATGTCATGATGAGCTATTcggatccccgggttaattaa
MRG432	AGCCAAACACCTTTTTAAATGGTTGGTATGCTCCAAAAAGgaattcgagctcgtttaaac
MRG433	AATTACAGACGTAACTAACGGTGCGGCAGAGTGTGTCAGAcggatccccgggttaattaa
MRG434	CATCGACTTTCCGGACATTGTACTGTGGGTTTTGTGCATAgaattcgagctcgtttaaac
MRG435	AAACCTGGTGGCATCAACGTGATTTTTGGAAGAAAGAATAgaattcgagctcgtttaaac
MRG444	TCAAAGAGTTCGTGACCAGTTATTGCTGATAAATGCCGTTCGGATCCCCGGGTTAATTAA
MRG445	TGAATATTAGTACTGTGTATATTTGCTAGTCGTTCCTAAAGAATTCGAGCTCGTTTAAAC
MRG446	AGTCAACTTCCAATGCCTCAATAATTTGAGCTTCAACAAACGGATCCCCGGGTTAATTAA
MRG447	AGCAAATATACACAGTACTAATATTCAGTTAATTATCACGGAATTCGAGCTCGTTTAAAC
MRG454	AGA GCT TGC TGA CAG TGA TAC
MRG460	ATCACGTTGATGCCACCAGGTTTTTTTTTCTTATTATTTCATTTCGTTAAATAGAAAGAA
MRG461	AAACGAGTAGAGATTTATCGATGTGAAAAAATCTCTCAGGTTTTGGTAATATAAAAATGT
MRG462	ATCACGTTGATGCCACCAGGTTTTTTTTTCTTATTATTTCATTTCGTTAAATAGAAAGAA
MRG463	AAACGAGTAGAGATTTATCGATGTGAAAAAATCTCTCAGGTTTTGGTAATATAAAAATGT
MRG464	AAATGCCATGAAAACGTGAACAGAAACTTTTATTGAGGTCGAATTCGAGCTCGTTTAAAC
MRG465	GCCCACACGCACGTTTGGATTATTACCTTCAATGACATTGCGGATCCCCGGGTTAATTAA
MRG472	TAATTTTCAGGGTGTTTTCG
MRG473	ATTCAAAATGCAAAAATTGG
MRG476	ACAATGTTGCAAACCAAAAG
MRG477	AGGGCCCTAATACGTAACTC
MRG491	ATTCGTATAAtCAAGGATATAAGCC	sno1-nonsense site-directed mutagenesis
MRG492	TTGTTCATAATCCGGAAAAG	sno1-nonsense site-directed mutagenesis
MRG494	ATTTCGTTAAATAGAAAGAAAAACCATATCTTAAAGTATGcggcatcagagcagattgta
MRG495	TTTTGGTAATATAAAAATGTGGAAAACCGGCGGTATTTTAggtgatggttcacgtagtgg
MRG496	ATTTCGTTAAATAGAAAGAAAAACCATATCTTAAAGTatgcacaaaacccacagtac
MRG497	TTTTGGTAATATAAAAATGTGGAAAACCGGCGGTATTTTAattagaaacaaactgtc
MRG499	TTTTGGTAATATAAAAATGTGGAAAACCGGCGGTATTTTAGAGCGACCTCATACTATACC
MRG501	ATACTTTTTATATTACATCAATCATTGTCATTATCAAATGcggatccccgggttaattaa
MRG502	CCAAGTTTAACATTTTATTTTAACAGGGTTCACCGAATTAgaattcgagctcgtttaaac
MRG504	TATTGTATCTGCATTGATAATACATTGGACAGAAATTATGcggatccccgggttaattaa
MRG505	TAGTAAAAATTTAAAGAACTATATTCGCAAAAGAATCTCAgaattcgagctcgtttaaac
MRG551	CTATTGTAGCGGATTGGGTC
MRG573	ccagtgagcagagtgacgaggactcgagctcaagcttttttttttttttttt	Scotto-Lavino et al., 2007, "Qt"
MRG574	ccagtgagcagagtgacg	Scotto-Lavino et al., 2007, "Qo"
MRG575	gaggactcgagctcaagc	Scotto-Lavino et al., 2007, "QI"
MRG576	ATGTGGGAGCAACGCACAAC	CTF13 GSP1, 3' RACE
MRG577	CATGAAGAGCCTGCGGAAGA	CTF13 GSP2, 3' RACE
